# Supplementary material
Source: MDPI journal article supplement (https://www.mdpi.com/2073-445X/10/12/1355)
Supplement: s1 [file s1]

## Supplementary Material

Table S1. Specifications for aerial photo data used to assess land cover change.

| Acquisition Year | Province     | Number of Photos or Tiles | Scale*      | Colour           | Resolution (m) | Georeferencing Error** | Source                                          |
|------------------|--------------|---------------------------|-------------|------------------|----------------|------------------------|-------------------------------------------------|
| 1976             | Alberta      | 77                        | 1:1200<br>0 | Monochromatic    | 0.27           | 2.55                   | Alberta Aerial Photographic Record System       |
| 1998             | Alberta      | 20                        | 1:3000<br>0 | Monochromatic    | 0.66           | 3.28                   | Alberta Aerial Photographic Record System       |
| 2018             | Alberta      | 12                        | N/A         | Red, green, blue | 0.25           | 0.00                   | Tarin Resource Services                         |
| 1979             | Saskatchewan | 4                         | 1:2000<br>0 | Monochromatic    | 1.70           | 6.1                    | Saskatchewan Ministry of Parks, Culture & Sport |
| 1991             | Saskatchewan | 42                        | 1:2100<br>0 | Monochromatic    | 0.87           | 3.83                   | Saskatchewan Ministry of Parks, Culture & Sport |
| 2018             | Saskatchewan | 6                         | N/A         | Red, green, blue | 0.3            | 0.00                   | Saskatchewan Ministry of Parks, Culture & Sport |

Table S2. Formulations for the set of candidate models. Models 1-10 were considered for all response variables. Models 11-20, which included effects of grazing, were only considered for regeneration density.

| Model | Formula for linear predictor*                                   |
|-------|-----------------------------------------------------------------|
| 1     | Base model                                                      |
| 2     | Base model $\times$ (1 + E)                                     |
| 3     | Base model $\times$ (1 + S)                                     |
| 4     | Base model $\times$ (1 + EA + NA)                               |
| 5     | Base model $\times$ (1 + E + S)                                 |
| 6     | Base model $\times$ (1 + E + EA + NA)                           |
| 7     | Base model $\times$ (1 + S + EA + NA)                           |
| 8     | Base model $\times$ (1 + S $\times$ EA + S $\times$ NA)         |
| 9     | Base model $\times$ (1 + E + S + EA + NA)                       |
| 10    | Base model $\times$ (1 + E + S $\times$ EA + S $\times$ NA)     |
| 11    | Base model + G                                                  |
| 12    | Base model $\times$ (1 + E) + G                                 |
| 13    | Base model $\times$ (1 + S) + G                                 |
| 14    | Base model $\times$ (1 + EA + NA) + G                           |
| 15    | Base model $\times$ (1 + E + S) + G                             |
| 16    | Base model $\times$ (1 + E + EA + NA) + G                       |
| 17    | Base model $\times$ (1 + S + EA + NA) + G                       |
| 18    | Base model $\times$ (1 + E + S + EA + NA) + G                   |
| 19    | Base model $\times$ (1 + S $\times$ EA + S $\times$ NA) + G     |
| 20    | Base model $\times$ (1 + E + S $\times$ EA + S $\times$ NA) + G |

\*E = (elevation-1300)/100; S= (slope/5); EA (easterly aspect) = cos(90-aspect);  
NA (northerly aspect) = sin(90-aspect); G = (grazing-5)/5

Table S3. Posterior estimates and credible interval (CI) values for the selected land cover change model (model 9 in Table S2).

| <i>Model parameter</i> | <b>Land cover change 1990s-2018<br/>Model 9 Summary</b> |                           |                           | <b>Land cover change 1970s-1990s<br/>Model 9 Summary</b> |                           |                           |
|------------------------|---------------------------------------------------------|---------------------------|---------------------------|----------------------------------------------------------|---------------------------|---------------------------|
|                        | <i>Posterior<br/>estimate</i>                           | <i>Lower CI<br/>(95%)</i> | <i>Upper CI<br/>(95%)</i> | <i>Posterior<br/>estimate</i>                            | <i>Lower CI<br/>(95%)</i> | <i>Upper CI<br/>(95%)</i> |
| Intercept              | -4.16                                                   | -4.88                     | -3.50                     | -4.04                                                    | -4.81                     | -3.35                     |
| Distance               | -1.88                                                   | -2.80                     | -1.01                     | -2.05                                                    | -3.02                     | -1.13                     |
| Elevation              | 0.28                                                    | -0.27                     | 0.85                      | -0.01                                                    | -0.58                     | 0.56                      |
| Slope                  | -1.63                                                   | -2.59                     | -0.72                     | -1.12                                                    | -1.99                     | -0.30                     |
| Easterly Aspect (EA)   | 0.67                                                    | 0.04                      | 1.31                      | 0.38                                                     | -0.28                     | 1.08                      |
| Northerly Aspect (NA)  | 0.46                                                    | -0.09                     | 1.02                      | 0.62                                                     | 0.02                      | 1.27                      |
| Distance*Elevation     | 0.49                                                    | -0.23                     | 1.20                      | 0.33                                                     | -0.40                     | 1.08                      |
| Distance*Slope         | -1.79                                                   | -2.93                     | -0.69                     | -1.39                                                    | -2.42                     | -0.39                     |
| Distance*EA            | 0.22                                                    | -0.60                     | 1.04                      | -0.27                                                    | -1.11                     | 0.64                      |
| Distance*NA            | 0.86                                                    | 0.12                      | 1.58                      | 0.60                                                     | -0.20                     | 1.45                      |

Table S4. Posterior estimates and credible interval (CI) values for selected models estimating upper canopy height and canopy cover for forests established in time interval 1 (model 3 in Table S2), forests established in time interval 2 (models 2 and 6 in Table S2), and tree cover in grasslands within 50 m of the forest edge (models 8 and 10 in Table S2).

| <b>Forests established in time interval 1 (1970s-90s)</b>  |                           |                       |                       |
|------------------------------------------------------------|---------------------------|-----------------------|-----------------------|
| <b>Height</b>                                              |                           |                       |                       |
| <i>Model parameter</i>                                     | <i>Posterior estimate</i> | <i>Lower CI (95%)</i> | <i>Upper CI (95%)</i> |
| Intercept                                                  | 13.8                      | 13.46                 | 14.13                 |
| Slope                                                      | -0.55                     | -0.82                 | -0.29                 |
| <b>Canopy cover</b>                                        |                           |                       |                       |
| Intercept                                                  | 0.41                      | 0.39                  | 0.42                  |
| Slope                                                      | -0.02                     | -0.03                 | -0.01                 |
| <b>Forests established in time interval 2 (1990s-2018)</b> |                           |                       |                       |
| <b>Height</b>                                              |                           |                       |                       |
| <i>Model parameter</i>                                     | <i>Posterior estimate</i> | <i>Lower CI (95%)</i> | <i>Upper CI (95%)</i> |
| Intercept                                                  | 11.74                     | 11.35                 | 12.13                 |
| Elevation                                                  | -1.17                     | -1.64                 | -0.71                 |
| <b>Canopy cover</b>                                        |                           |                       |                       |
| Intercept                                                  | 0.39                      | 0.37                  | 0.41                  |
| Elevation                                                  | -0.06                     | -0.08                 | -0.04                 |
| Easterly aspect (EA)                                       | 0.02                      | -0.01                 | 0.04                  |
| Northerly aspect (NA)                                      | 0.03                      | 0.00                  | 0.05                  |
| <b>Grassland within 50 m of the forest edge</b>            |                           |                       |                       |
| <b>Height</b>                                              |                           |                       |                       |
| <i>Model parameter</i>                                     | <i>Posterior estimate</i> | <i>Lower CI (95%)</i> | <i>Upper CI (95%)</i> |
| Intercept                                                  | 7.85                      | 7.19                  | 8.53                  |
| Slope                                                      | 0.93                      | 0.51                  | 1.35                  |
| Easterly aspect (EA)                                       | -0.13                     | -1.09                 | 0.87                  |
| Northerly aspect (NA)                                      | -0.16                     | -1.01                 | 0.69                  |
| Slope x EA                                                 | 0.51                      | -0.08                 | 1.10                  |
| Slope x NA                                                 | 0.52                      | -0.01                 | 1.06                  |
| <b>Canopy cover</b>                                        |                           |                       |                       |
| Intercept                                                  | 0.17                      | 0.15                  | 0.19                  |
| Elevation                                                  | -0.01                     | -0.02                 | 0.00                  |
| Slope                                                      | 0.02                      | 0.01                  | 0.03                  |
| Easterly aspect (EA)                                       | 0.00                      | -0.03                 | 0.01                  |
| Northerly aspect (NA)                                      | -0.01                     | -0.03                 | 0.01                  |
| Slope x EA                                                 | 0.01                      | 0.00                  | 0.03                  |
| Slope x NA                                                 | 0.02                      | 0.01                  | 0.04                  |

Table S5. Posterior estimates and credible intervals (CI) for the selected regeneration density models (model 9 in Table S2) for white spruce, trembling aspen and lodgepole pine.

| <i>Model parameter</i>                | <b>White Spruce</b>       |                       |                       | <b>Trembling Aspen</b>    |                       |                       | <b>Lodgepole Pine</b>     |                       |                       |
|---------------------------------------|---------------------------|-----------------------|-----------------------|---------------------------|-----------------------|-----------------------|---------------------------|-----------------------|-----------------------|
|                                       | <i>Posterior estimate</i> | <i>Lower CI (95%)</i> | <i>Upper CI (95%)</i> | <i>Posterior estimate</i> | <i>Lower CI (95%)</i> | <i>Upper CI (95%)</i> | <i>Posterior estimate</i> | <i>Lower CI (95%)</i> | <i>Upper CI (95%)</i> |
| <b><u>Random effects</u></b>          |                           |                       |                       |                           |                       |                       |                           |                       |                       |
| $\sigma_{\text{Intercept}}$           | 0.98                      | 0.04                  | 2.58                  | 3.34                      | 2.73                  | 4.03                  | 2.16                      | 1.38                  | 3.09                  |
| $\sigma_{\text{Distance}}$            | 1.38                      | 0.65                  | 2.20                  | 1.02                      | 0.83                  | 1.24                  | 0.47                      | 0.15                  | 0.80                  |
| $\sigma_{\text{Intercept, Distance}}$ | 0.17                      | -0.76                 | 0.96                  | -0.39                     | -0.64                 | -0.07                 | -0.29                     | -0.78                 | 0.43                  |
| <b><u>Regression Coefficients</u></b> |                           |                       |                       |                           |                       |                       |                           |                       |                       |
| Intercept                             | -4.39                     | -6.32                 | -2.73                 | -0.56                     | -1.78                 | 0.61                  | -8.45                     | -10.96                | -6.37                 |
| Distance                              | -2.95                     | -4.67                 | -1.54                 | -1.74                     | -2.26                 | -1.26                 | -0.28                     | -1.15                 | 0.48                  |
| Elevation                             | -1.30                     | -2.09                 | -0.61                 | -1.01                     | -1.68                 | -0.36                 | 2.5                       | 1.19                  | 4.07                  |
| Slope                                 | 1.34                      | 0.37                  | 2.35                  | -0.17                     | -1.01                 | 0.67                  | 0.59                      | -0.26                 | 1.50                  |
| Easterly aspect (EA)                  | 1.25                      | 0.00                  | 2.50                  | -0.73                     | -1.76                 | 0.28                  | 1.9                       | 0.58                  | 2.94                  |
| Northerly aspect (NA)                 | 1.36                      | 0.48                  | 5.27                  | 0.31                      | -0.49                 | 1.10                  | -0.21                     | -1.15                 | 0.64                  |
| Distance x Elevation                  | 0.97                      | 0.40                  | 1.62                  | 0.03                      | -0.25                 | 0.29                  | -0.05                     | -0.52                 | 0.47                  |
| Distance x Slope                      | -0.03                     | -0.68                 | 0.66                  | 0.03                      | -0.30                 | 0.37                  | -0.22                     | -0.53                 | 0.08                  |
| Distance x EA                         | -0.17                     | -1.02                 | 0.69                  | 0.23                      | -0.16                 | 0.60                  | 0.21                      | -0.17                 | 0.62                  |
| Distance x NA                         | -0.75                     | -1.45                 | -0.11                 | -0.14                     | -0.44                 | 0.18                  | -0.22                     | -0.52                 | 0.07                  |

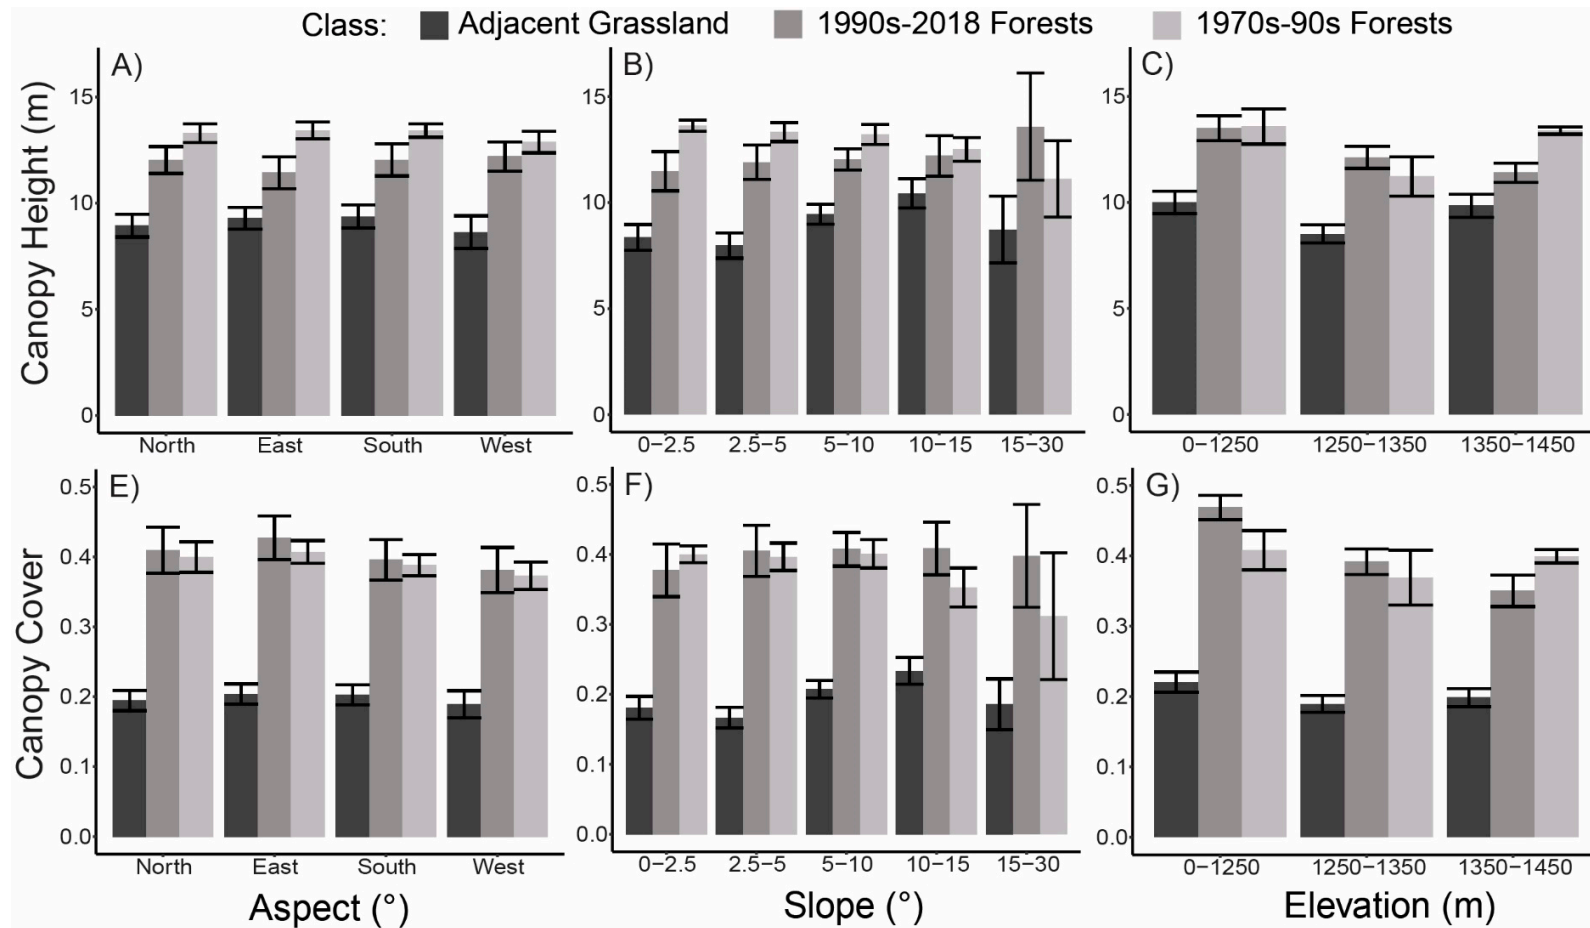

Figure S1. Observed upper canopy height (95<sup>th</sup> percentile) and canopy cover of ~1-ha areas by land cover category in relation to aspect, slope and elevation. Error bars represent standard error.

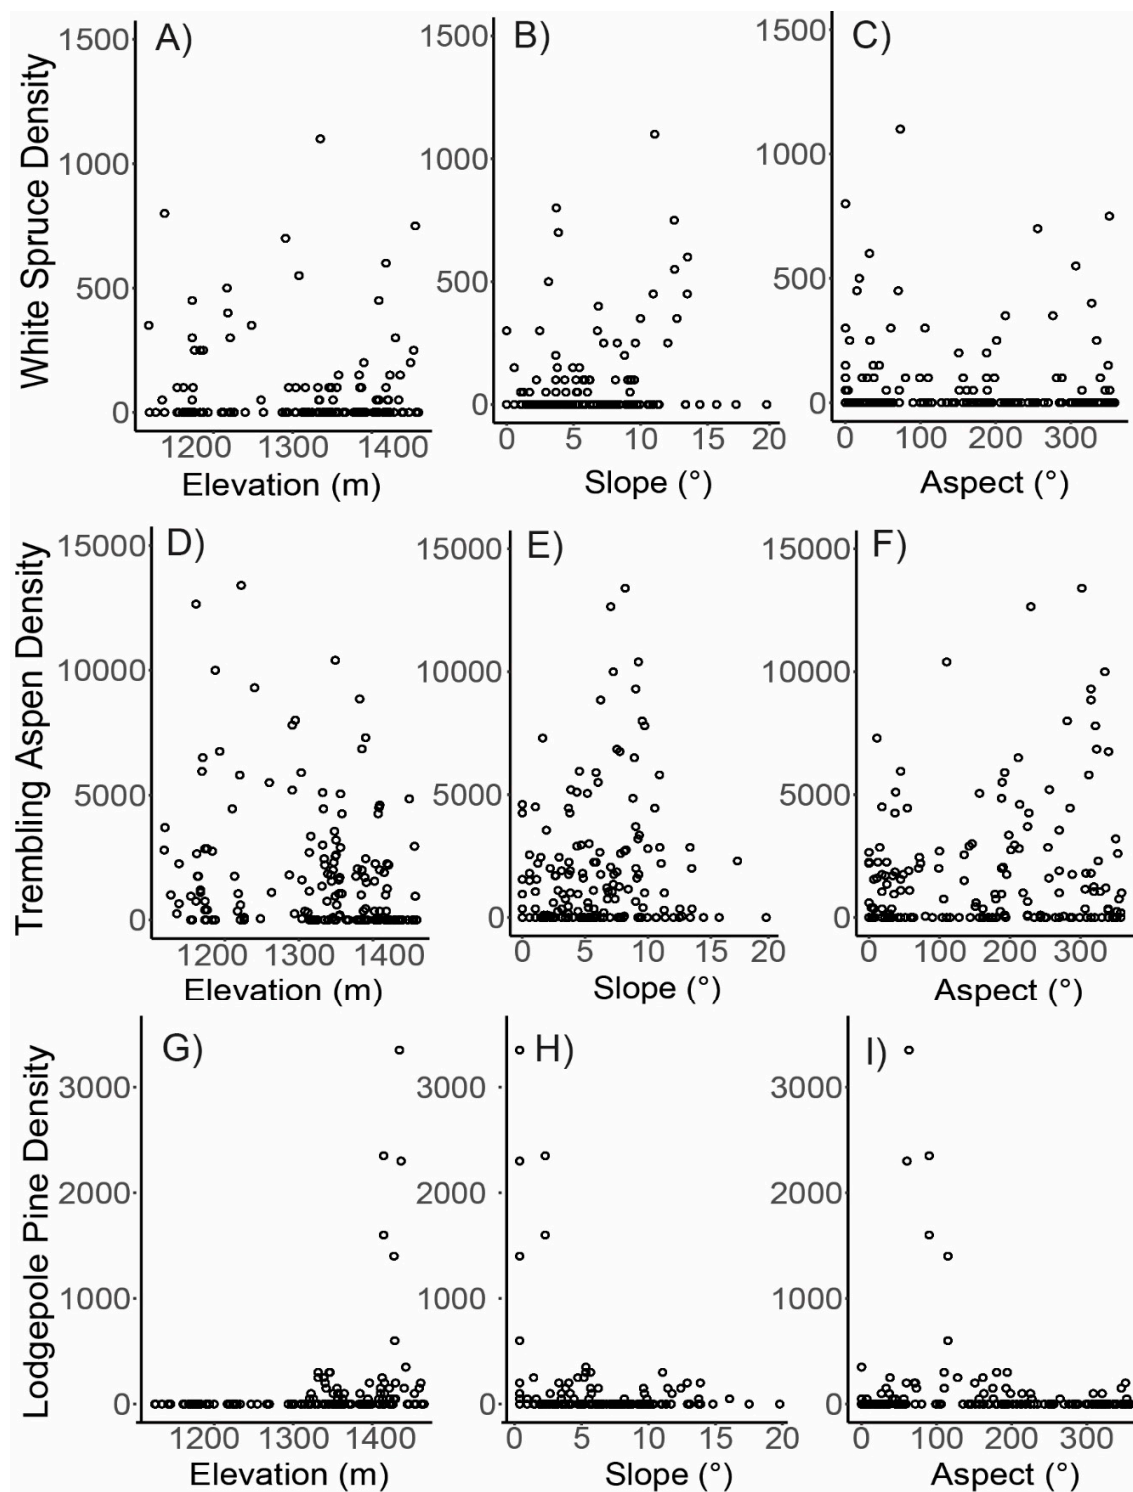

Figure S2. Mean regeneration density (stems/ha) from field transects of white spruce (A-C), trembling aspen (D-F), and lodgepole pine (G-I) in relation to elevation, slope and aspect.

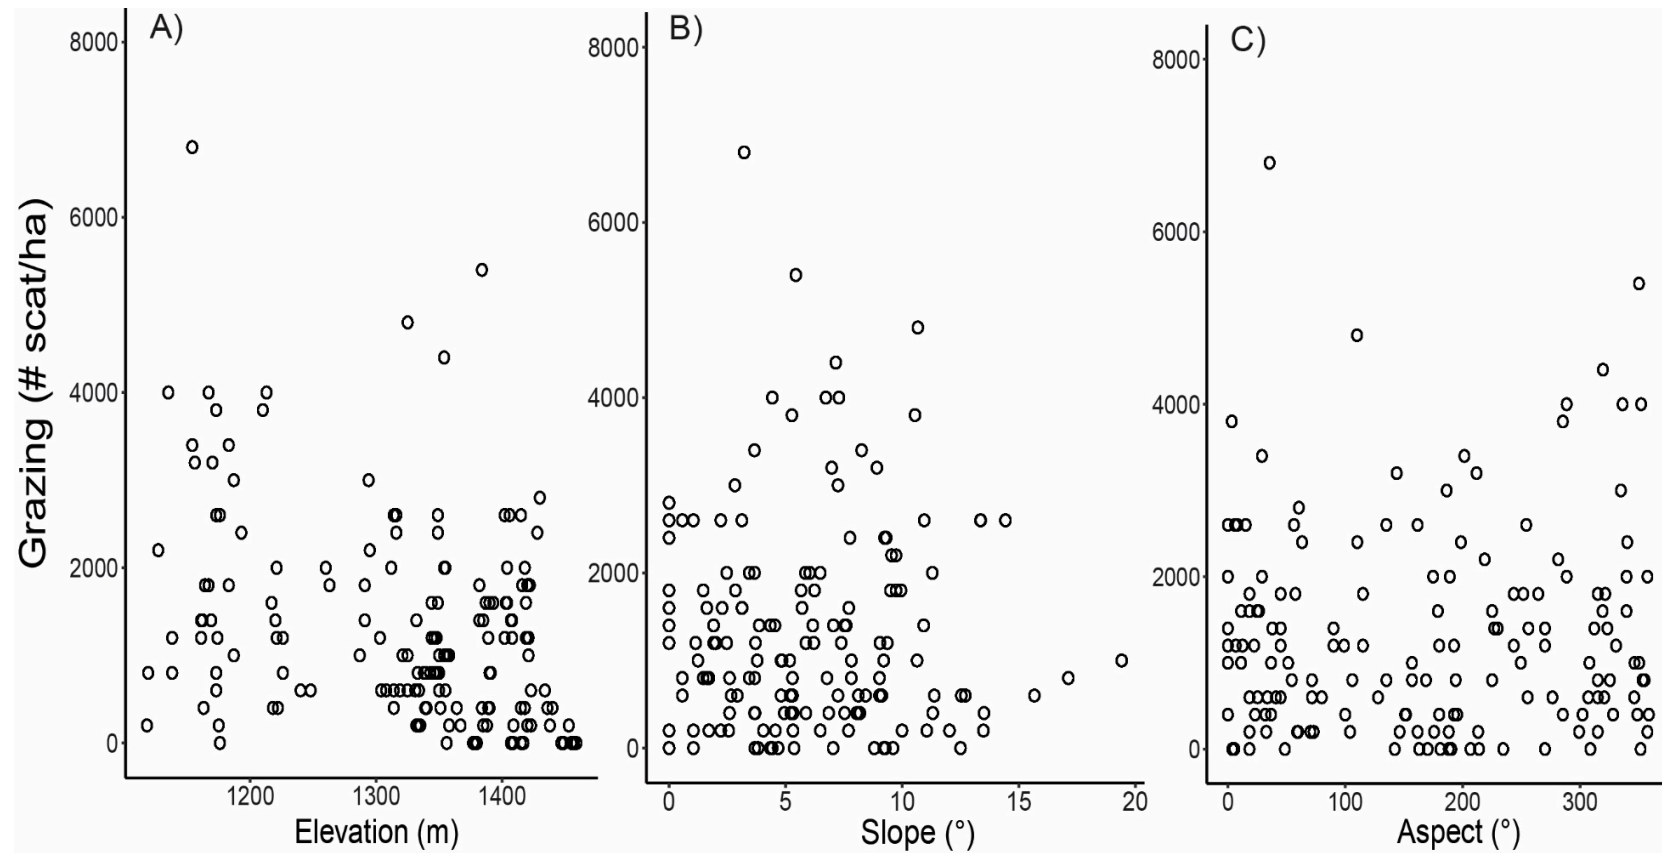

Figure S3. Variation in activity of cattle and other ungulates, as measured by scat density, by elevation, slope, and aspect.



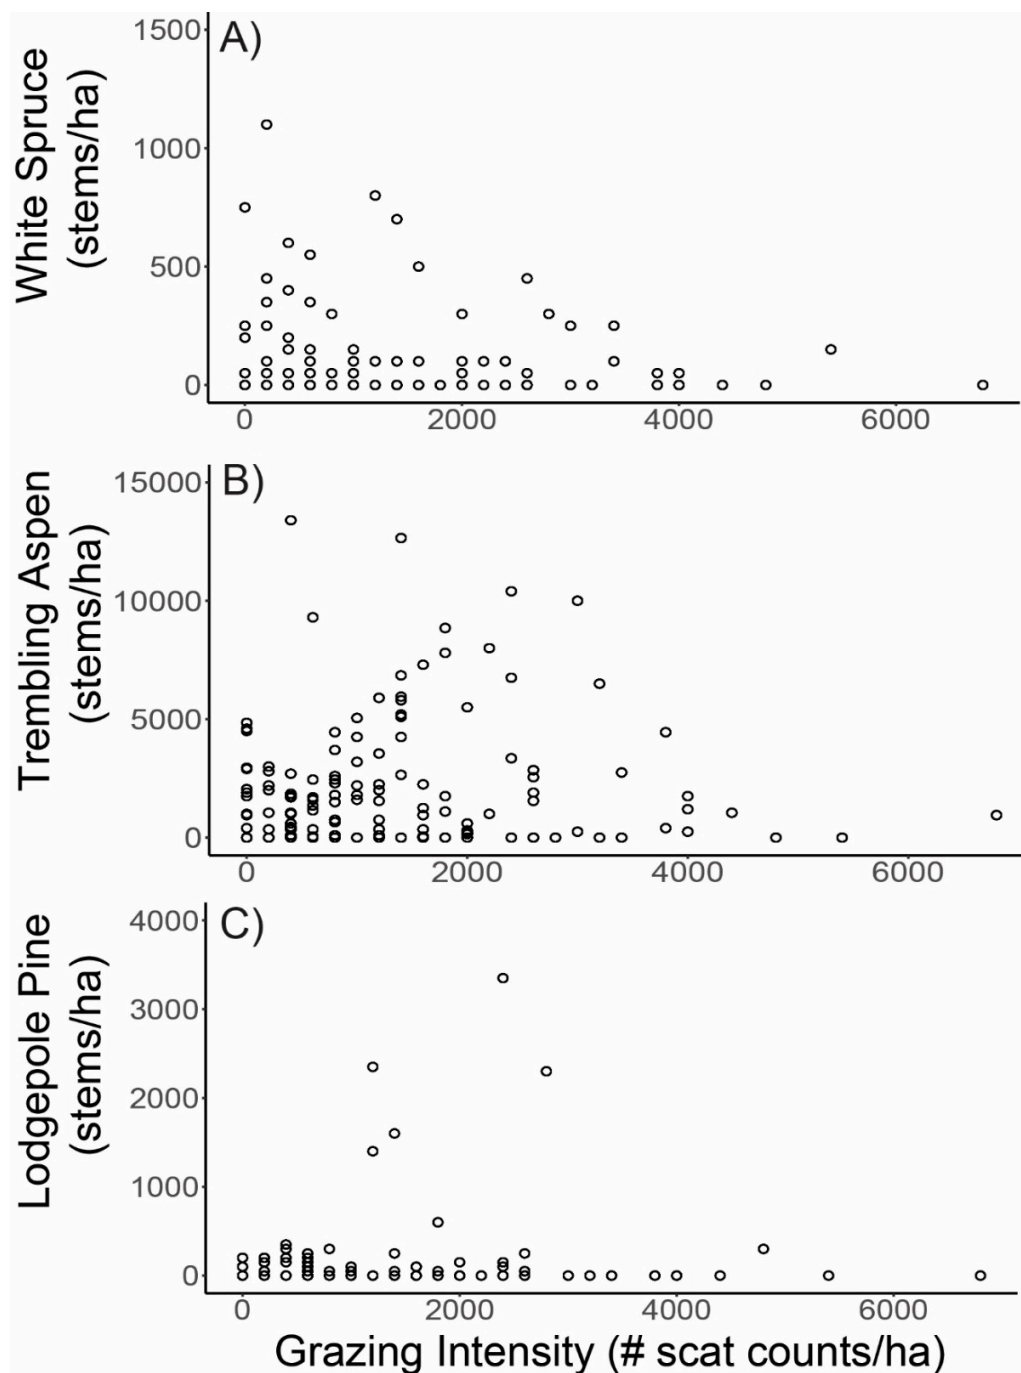

Figure S4. Relationships between tree regeneration density in grassland areas within 50 m of the forest edge and grazing intensity. Topographic variables appeared to explain these patterns, as an independent grazing effect was not supported by our model selection process
